# Supplementary material for: Fidgetin-like 2 depletion enhances cell migration by regulating GEF-H1, RhoA, and FAK
Source: PubMed Central journal article supplement — Biophys J. 2022 Dec 15;122(18):3600–10. doi: 10.1016/j.bpj.2022.12.018 (PMC10541466; doi:10.1016/j.bpj.2022.12.018), 2022-12-15
Supplement: mmc1.pdf [file mmc1.pdf]

**Biophysical Journal, Volume 122**

**Supplemental information**

**Fidgetin-like 2 depletion enhances cell migration by regulating GEF-H1,  
RhoA, and FAK**

**Karishma Smart, Adam H. Kramer, Sachin Smart, Louis Hodgson, and David J. Sharp**

## Supplementary Information for:

### Fidgetin-like 2 depletion enhances cell migration by regulating GEF-H1, RhoA, and FAK.

Karishma Smart, M.S.<sup>1</sup>; Adam H Kramer, Ph.D.<sup>2</sup>; Sachin Smart, M.S.<sup>3</sup>; Louis Hodgson, Ph.D.<sup>\*1,4</sup>; David J Sharp, Ph.D.<sup>\*1,2,5</sup>

<sup>1</sup> Department of Molecular Pharmacology; Albert Einstein College of Medicine; Bronx, NY 10461; USA

<sup>2</sup> Microcures, Inc.; Research and Development; Bronx, NY 10461; USA

<sup>3</sup> Independent researcher; London, EC4M 7DE; UK

<sup>4</sup> Gruss-Lipper Biophotonics Center; Albert Einstein College of Medicine; Bronx, NY 10461; USA

## Supplementary Figures

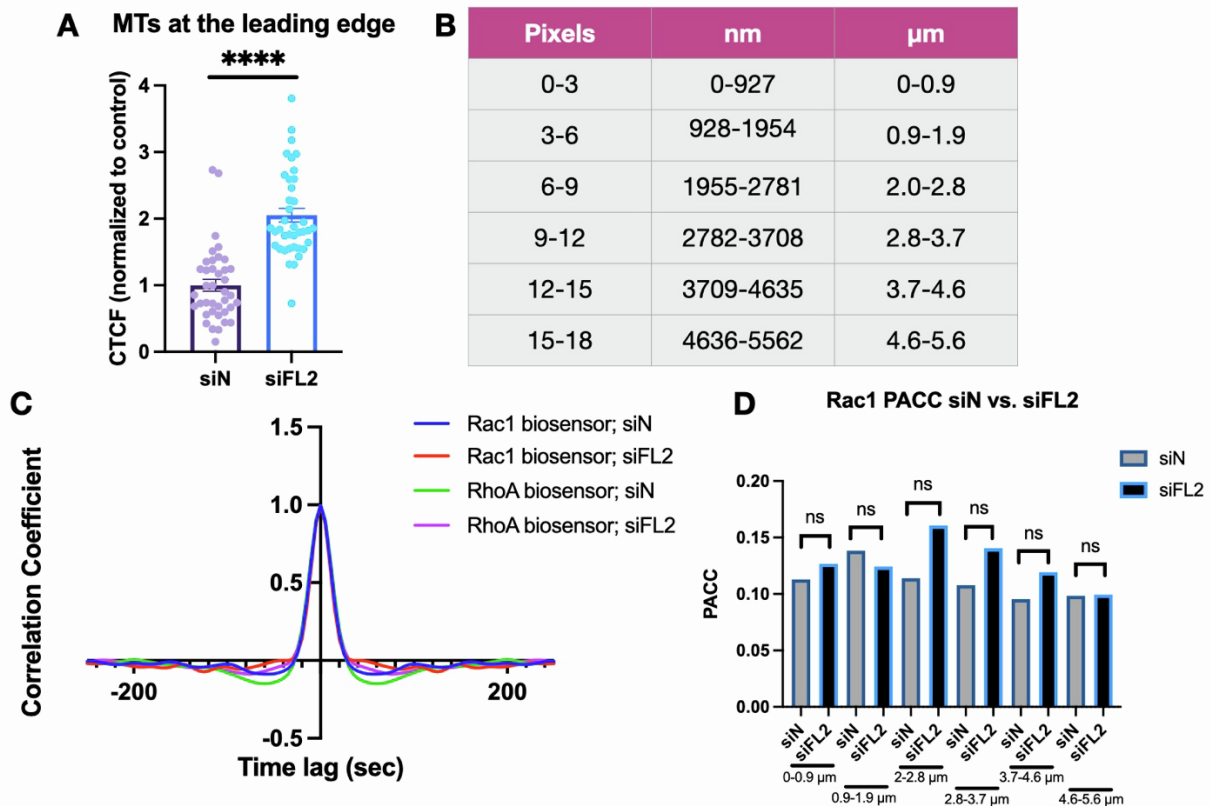

**Figure S1. Protrusion velocity autocorrelation. (A)** Scatterplot of MT fluorescence (indicating FL2 KD) in U2OS cells along a scratch. Datapoints represent individual cells. All analysis performed within 5.6  $\mu\text{m}$  of cortex. ( $n=39,39$ , mean $\pm$ -SEM; Welch's t-test, \*\*\*\* $p<0.0001$ ). **(B)** Conversion from distance in pixels (used in FRET analysis) to nm and  $\mu\text{m}$ . The 18-pixel-wide region from the leading edge analyzed in the FRET assays defines the 5.6  $\mu\text{m}$ -wide region analyzed in all subsequent studies. **(C)** Temporal autocorrelation of the leading edge protrusion velocity from experiments where RhoA and Rac1 fluctuations were measured at the leading edge. **(D)** Bar graph showing PACC of Rac1 FRET biosensor activation irrespective of time to

edge protrusion at various distances (up to 5.6  $\mu\text{m}$ ) away from the cortex after control or FL2 siRNA treatment. (n=401 windows/17 cells (siN), 334 windows/17 cells (siFL2); Student's t-test.)

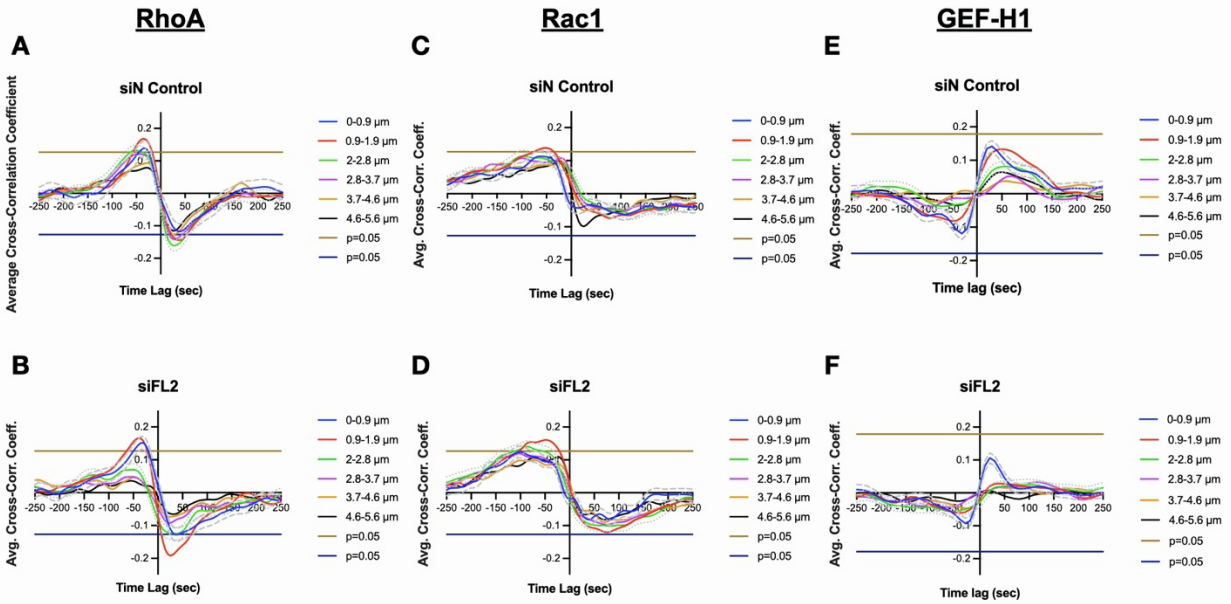

**Figure S2. RhoA, Rac1, and GEF-H1 involvement in edge protrusion shift to differing degrees after FL2 knockdown. (A- F) Curves showing correlation between FRET biosensor readouts (RhoA (A,B); Rac1 (C,D); GEF-H1 (E,F)) and edge velocity relative to edge protrusion initiation ( $x=0$ ) after either control siRNA (A,C,E) or FL2 siRNA (B,D,F) treatment. Curves plotted are spline fits from pooled correlation coefficients of individual cells. Individual curves represent various distances (up to 5.6  $\mu\text{m}$ ) away from the cell edge. Dashed and dotted lines show 95% confidence intervals, estimated by non-parametric bootstrapping. Horizontal lines indicate significance of Pearson's correlation coefficient at  $p<0.05$ . (A: n=440 windows, 21 cells; B: 462 windows, 21 cells; C: n=401 windows, 17 cells; D: 334 windows, 17 cells; E: 341 windows, 22 cells; F: 457 windows, 25 cells).**

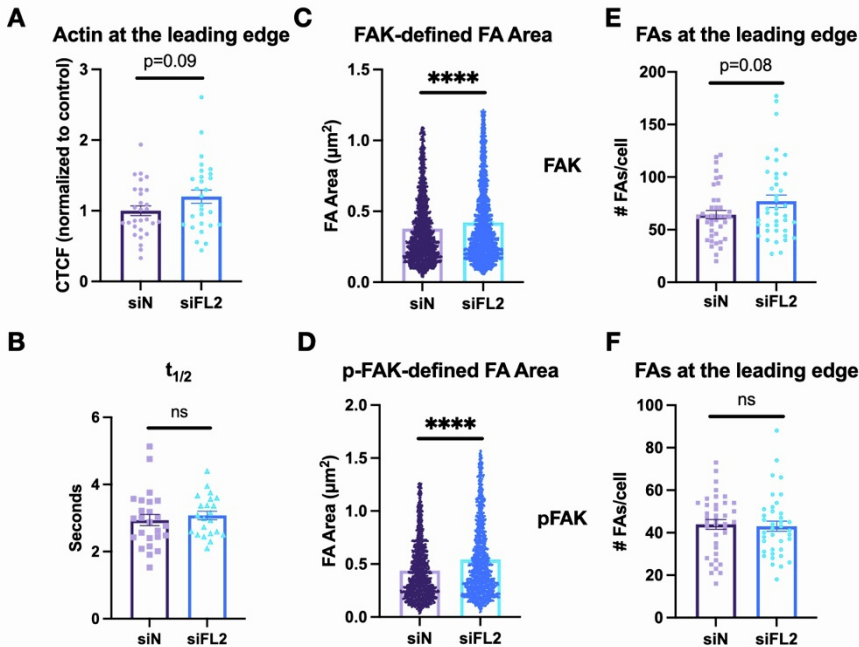

**Figure S3. FL2 knockdown increases FA area but not the number of FAs or actin polymerization at the leading edge.** (A) Scatterplot of phalloidin fluorescence intensity at the leading edge. Datapoints represent individual cells. (n=29,28 cells, mean $\pm$ -SEM; Welch's t-test). (B) Scatterplot of half-time to fluorescence recovery ( $t_{1/2}$ ) of F-tractin-eGFP at the leading edge using FRAP. Datapoints represent individual cells. (n=25,22 cells, mean $\pm$ -SEM; Welch's t-test.) All experiments performed in triplicate. (C-D) Scatterplots of FA area as defined by (C) FAK or (D) p-FAK fluorescence. Datapoints represent individual FAs. (C: n=2298,2733; D: n=1508,1481, mean $\pm$ -SEM; Welch's t-test, \* $p$ <0.05, \*\*\*\* $p$ <0.0001). (E-F) Scatterplots of number of FAs at the leading edge in U2OS cells along a scratch. FAs defined by either (E) FAK or (F) p-FAK immunofluorescence. Datapoints represent individual cells. (E: n=40,40; F: n=38,38, mean $\pm$ -SEM; Welch's t-test, \*\*\*\* $p$ <0.0001). All analyses performed within 5.6  $\mu$ m of cortex.

## Supplemental Video Captions

**Video S1. Representative RhoA activity in a siN control-treated U2OS cell stably expressing the RhoA FRET biosensor.** Linear pseudocolor map indicates RhoA activity. Images taken in 5-sec intervals for 20-minute time-lapse on a confocal microscope using a 40x oil objective. Scale bar indicates 10  $\mu$ m. Video plays at 20 frames per sec (fps).

**Video S2. Representative RhoA activity in a siFL2-treated U2OS cell stably expressing the RhoA FRET biosensor.** Linear pseudocolor map indicates RhoA activity. Images taken in 5-sec intervals for 20-minute time-lapse on a confocal microscope using a 40x oil objective. Scale bar indicates 10  $\mu$ m. Video plays at 20 frames per sec (fps).
